# Supplementary material for: Application of hydrophobically modified water-soluble polymers for the dispersion of hydrophobic magnetic nanoparticles in aqueous media
Source: Royal Society of Chemistry journal article supplement (doi:10.1039/c4dt00393d), 2014-01-01
Supplement: c4dt00393d1.pdf [file c4dt00393d1.pdf]

# Supporting Information

**Application of hydrophobically modified water-soluble polymers  
for the dispersion of hydrophobic magnetic nanoparticles  
in aqueous media**

Zacharoula Iatridi<sup>1</sup>, Violetta Georgiadou<sup>2</sup>, Melita Menelaou<sup>2</sup>, Catherine Dendrinou-Samara<sup>2\*</sup> and Georgios Bokias<sup>1\*</sup>

<sup>1</sup>. *Department of Chemistry, University of Patras, GR-26504 Patras, Greece*

<sup>2</sup>. *Department of Chemistry, Aristotle University of Thessaloniki, GR-54124*

*Thessaloniki, Greece*

\*Corresponding Authors

C. Dendrinou-Samara, Phone (+30) 2310-997876; Fax (+30) 2310-997876; E-mail [samkat@chem.auth.gr](mailto:samkat@chem.auth.gr)

G. Bokias, Phone (+30) 2610-997102; Fax (+30) 2610-997122; E-mail [bokias@upatras.gr](mailto:bokias@upatras.gr)

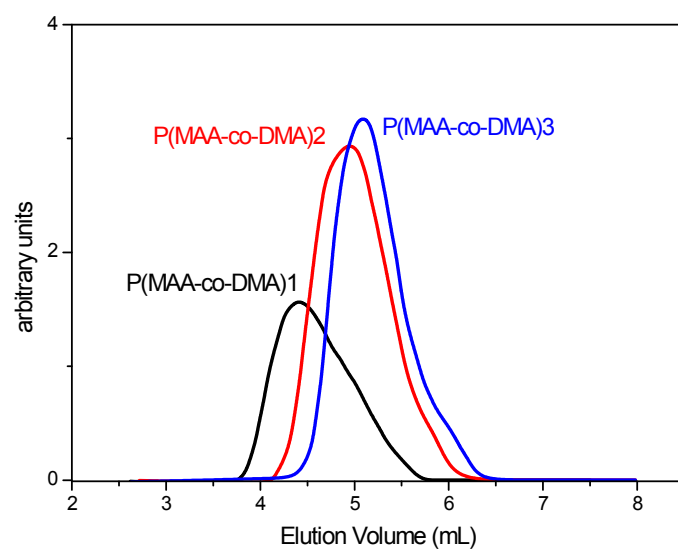

**Fig. S1.** GPC traces of P(MAA-co-DMA) copolymers in THF.

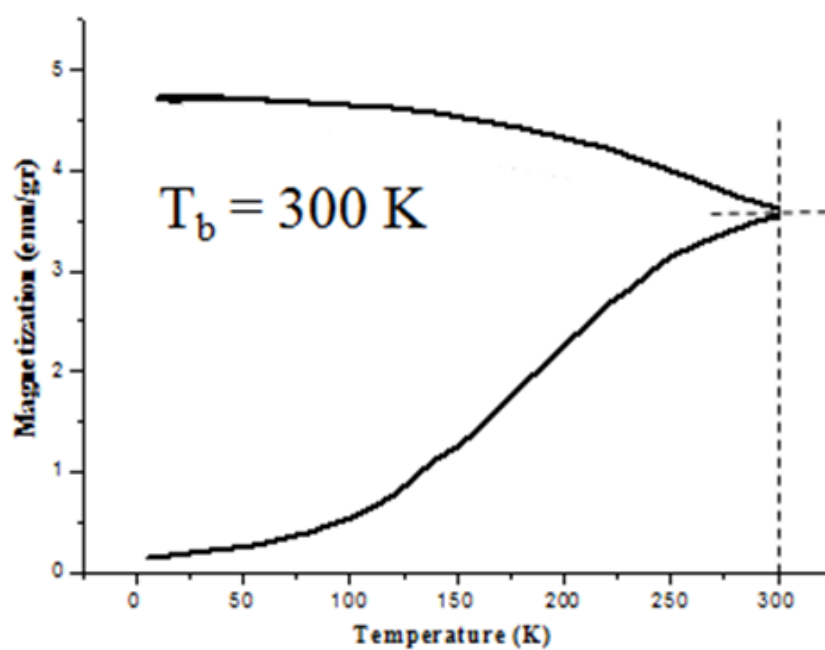

**Fig. S2.** ZFC/FC measurement

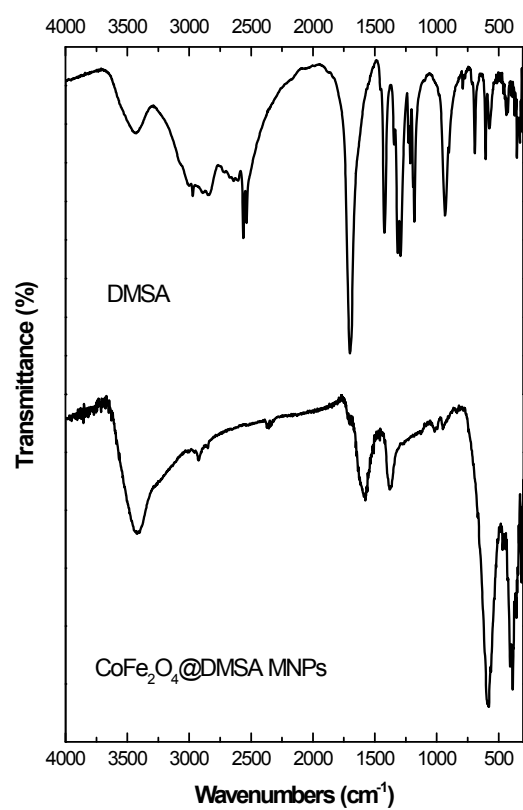

**Fig. S3.** FT-IR spectra of DMSA and CoFe<sub>2</sub>O<sub>4</sub>@DMSA MNPs.
